# Supplementary material for: MYC proteins promote neuronal differentiation by controlling the mode of progenitor cell division
Source: PubMed Central journal article supplement — EMBO Rep. 2014 Mar 5;15(4):383–91. doi: 10.1002/embr.201337424 (PMC3989669; doi:10.1002/embr.201337424), 2014-03-05
Supplement: embr0015-0383-sd3.pdf [file embr0015-0383-sd3.pdf]

Endogenous *c-myc* at E3.5, ISH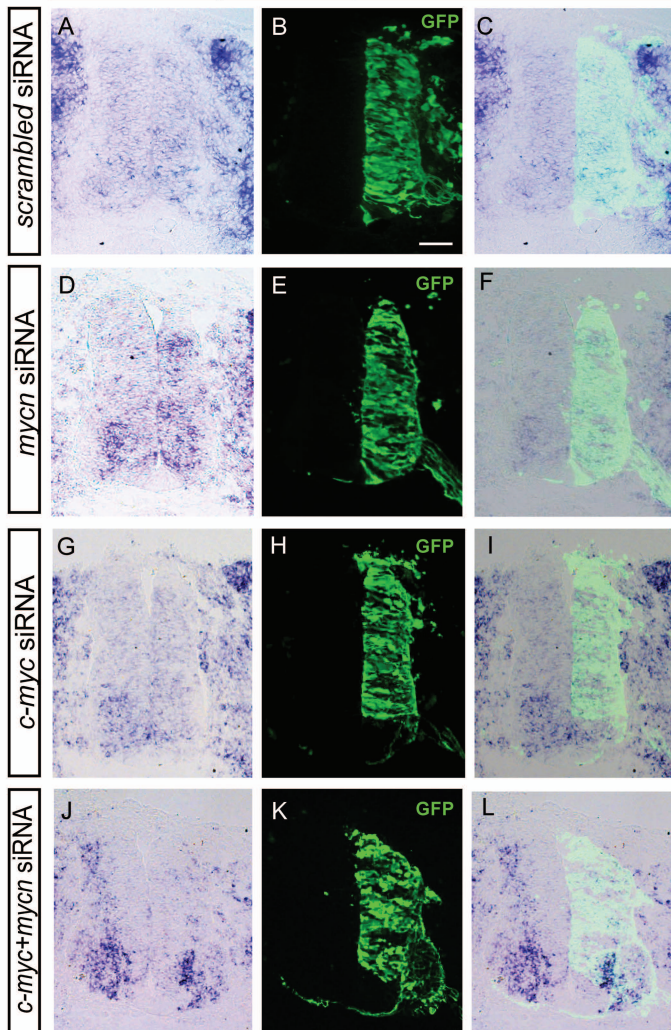Endogenous *mycn* at E3.5, ISH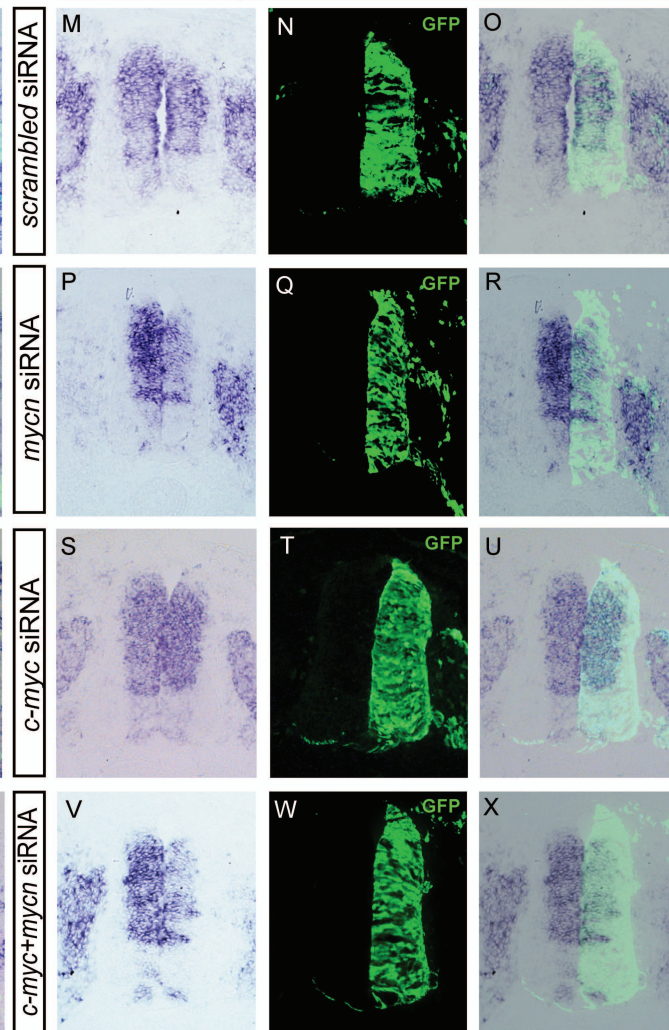

## NeuN at E4

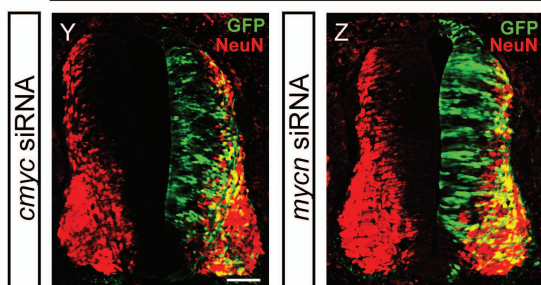

## EdU at E3

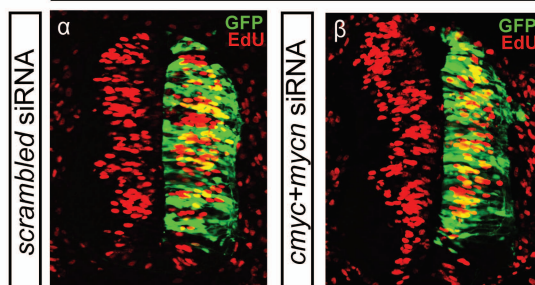

**Figure S2. Downregulation of MYCN causes a compensatory upregulation of c-MYC.** (A-L) Transversal chick sections analyzed by *in situ* hybridization (ISH) for the endogenous expression of *c-myc* in conditions with transfected *scrambled* siRNA (A-C), *mycn* siRNA (D-F), *c-myc* siRNA (G-I) and siRNAs directed against both *c-myc* and *mycn* (J-L). (M-X) Endogenous expression of *mycn* in conditions with transfected *scrambled* siRNA (M-O), *mycn* siRNA (P-R), *c-myc* siRNA (S-U) and siRNAs against both *c-myc* and *mycn* (V-X). (A-X) Transfected cells were detected by GFP. (Y-Z) Embryos at E4 stained for the neuronal differentiation marker NeuN in conditions with transfected siRNA against *c-myc* (Y) or siRNA against *mycn* (Z). ( $\alpha$ - $\beta$ ) Downregulation of *c-myc* and *mycn* by siRNAs at E3 followed by staining for EdU incorporation. Transfection of *scrambled* control siRNA ( $\alpha$ ) or siRNAs against both *c-myc* and *mycn* ( $\beta$ ). Scale bars: 50  $\mu$ m.
